# Supplementary material
Source: PubMed Central journal article supplement (PMC1435979)

M1 = Afl III marker  
 M2 = 100 bp ladder  
 D = Naked DNA digest  
 Digestion times indicated

Analysis tables:  
 2' lane was analyzed  
 in each case.

Plots of Base pairs / Band number:

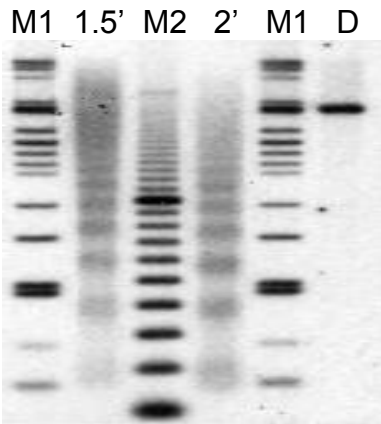

Chrom. 1-678

| Band # | bp   |
|--------|------|
| 7      | 1310 |
| 6      | 1130 |
| 5      | 950  |
| 4      | 760  |
| 3      | 570  |
| 2      | 360  |
| 1      | 170  |

sigma = 9.14734

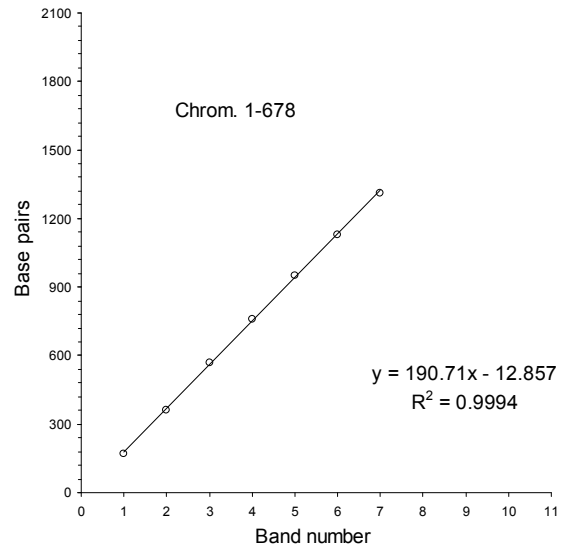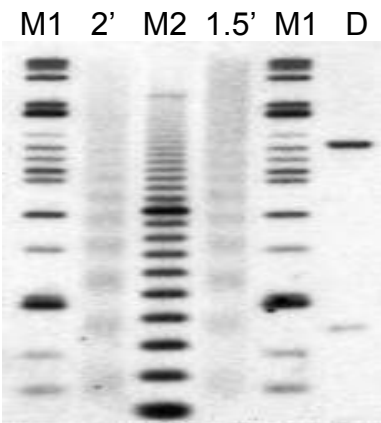

Chrom. 2-375

| Band # | bp   |
|--------|------|
| 11     | 1970 |
| 10     | 1800 |
| 9      | 1600 |
| 8      | 1420 |
| 7      | 1280 |
| 6      | 1090 |
| 5      | 910  |
| 4      | 720  |
| 3      | 540  |
| 2      | 360  |
| 1      | 160  |

sigma = 12.80498

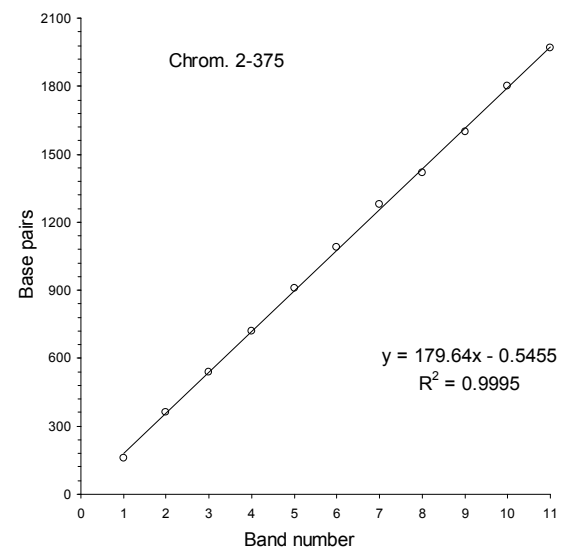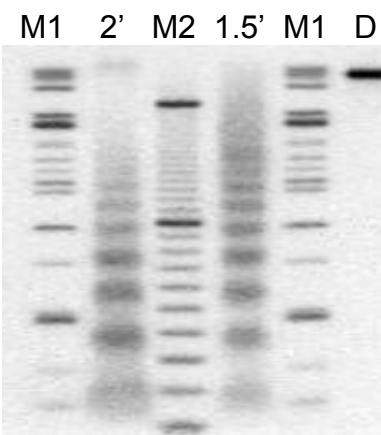

Chrom 2-450

| Band # | bp   |
|--------|------|
| 10     | 1810 |
| 9      | 1660 |
| 8      | 1450 |
| 7      | 1280 |
| 6      | 1110 |
| 5      | 930  |
| 4      | 730  |
| 3      | 550  |
| 2      | 360  |
| 1      | 170  |

sigma = 11.49967

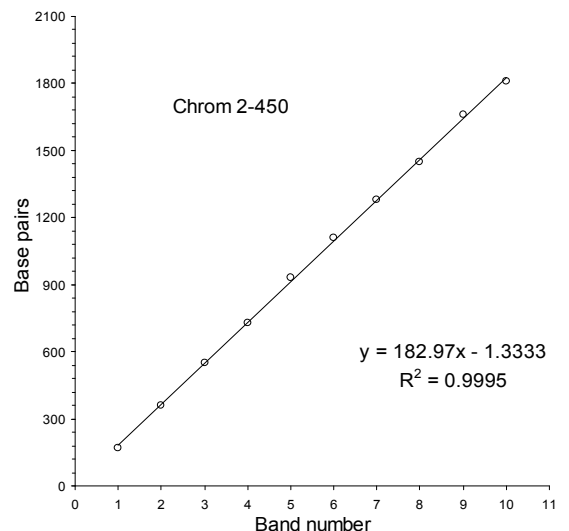

M1 = Afl III marker  
 M2 = 100 bp ladder  
 D = Naked DNA digest  
 Digestion times indicated

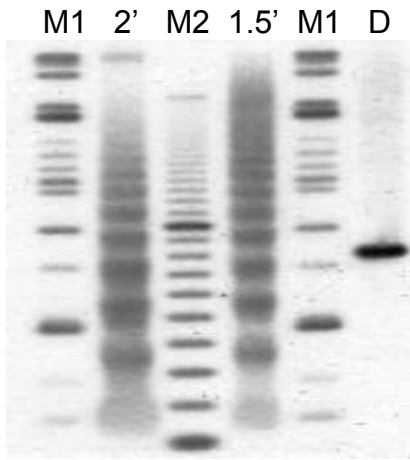

Chrom. 2-820

| Band # | bp   |
|--------|------|
| 1      | 170  |
| 2      | 370  |
| 3      | 550  |
| 4      | 730  |
| 5      | 900  |
| 6      | 1110 |
| 7      | 1270 |
| 8      | 1460 |
| 9      | 1630 |
| 10     | 1820 |
| 11     | 2020 |

sigma = 9.16335

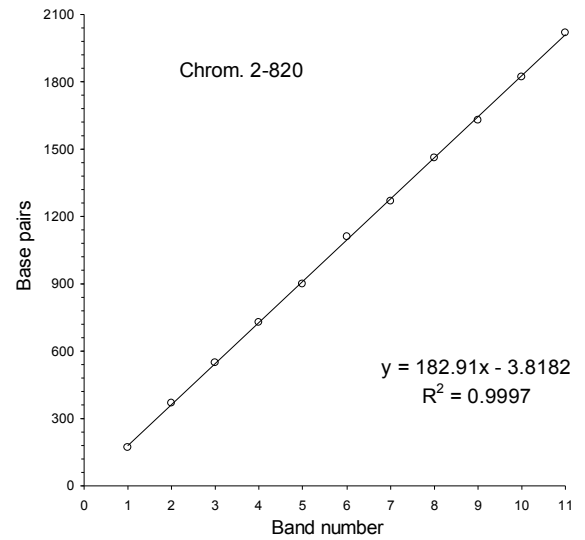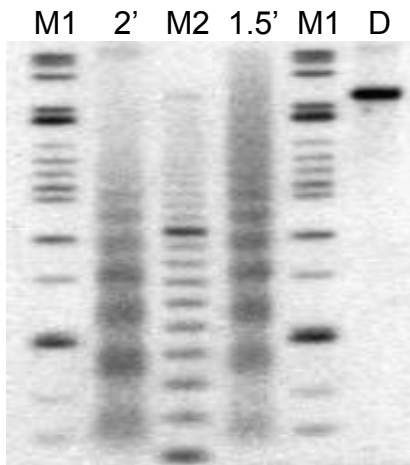

Chrom. 3-342

| Band # | bp   |
|--------|------|
| 10     | 1900 |
| 9      | 1700 |
| 8      | 1500 |
| 7      | 1300 |
| 6      | 1110 |
| 5      | 940  |
| 4      | 750  |
| 3      | 560  |
| 2      | 370  |
| 1      | 170  |

sigma = 9.178387

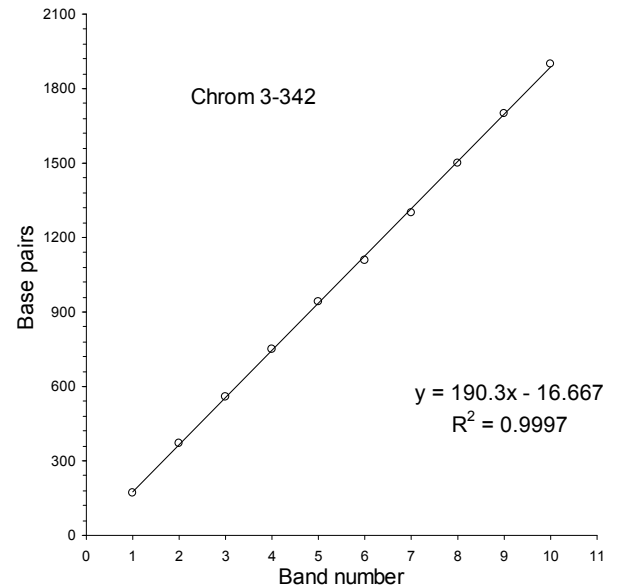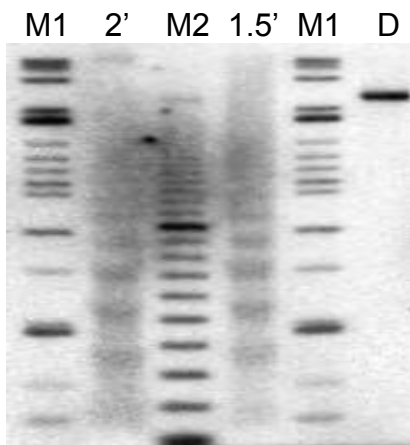

Chrom 3-413

| Band # | bp   |
|--------|------|
| 10     | 1810 |
| 9      | 1660 |
| 8      | 1450 |
| 7      | 1280 |
| 6      | 1110 |
| 5      | 930  |
| 4      | 730  |
| 3      | 550  |
| 2      | 360  |
| 1      | 170  |

sigma = 8.478139

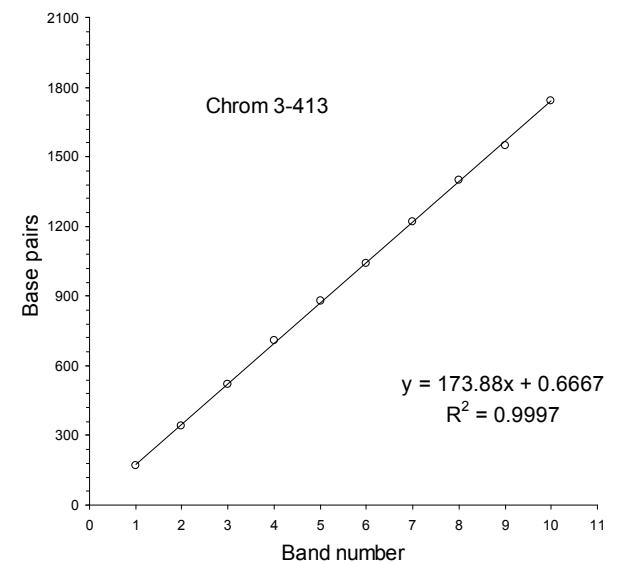

M1 = Afl III marker  
 M2 = 100 bp ladder  
 D = Naked DNA digest  
 Digestion times indicated

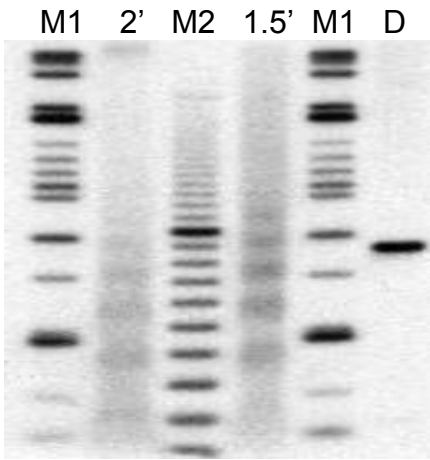

Chrom. 3-552

| Band # | bp   |
|--------|------|
| 8      | 1440 |
| 7      | 1260 |
| 6      | 1080 |
| 5      | 900  |
| 4      | 720  |
| 3      | 550  |
| 2      | 360  |
| 1      | 170  |

sigma = 4.879538

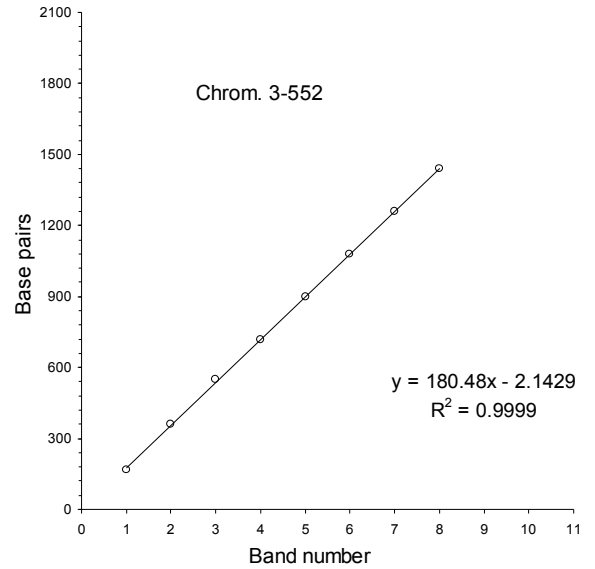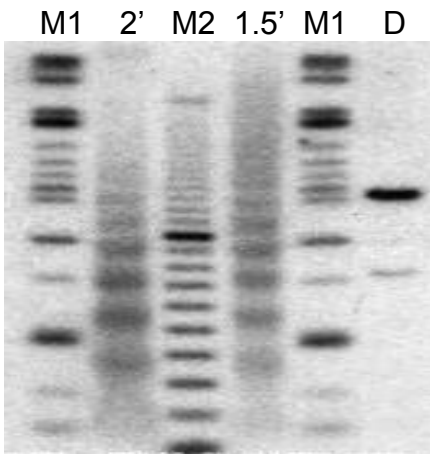

Chrom. 7-474

| Band # | bp   |
|--------|------|
| 8      | 1420 |
| 7      | 1250 |
| 6      | 1050 |
| 5      | 890  |
| 4      | 710  |
| 3      | 520  |
| 2      | 350  |
| 1      | 180  |

sigma = 7.206587

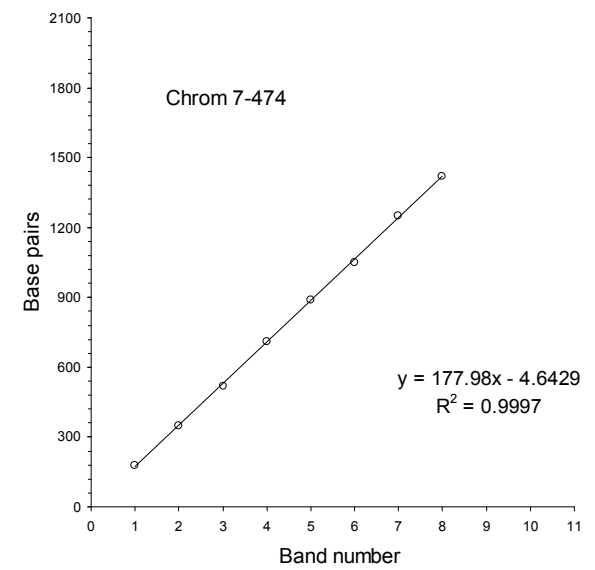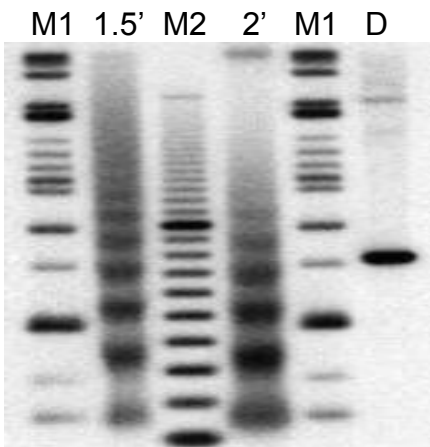

Chrom 7-500

| Band # | bp   |
|--------|------|
| 8      | 1370 |
| 7      | 1200 |
| 6      | 1040 |
| 5      | 870  |
| 4      | 690  |
| 3      | 510  |
| 2      | 340  |
| 1      | 170  |

sigma = 5.837591

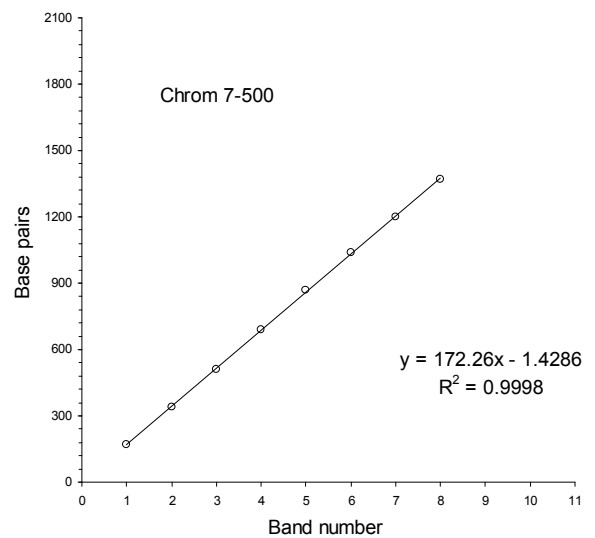

M1 = Afl III marker  
 M2 = 100 bp ladder  
 D = Naked DNA digest  
 Digestion times indicated

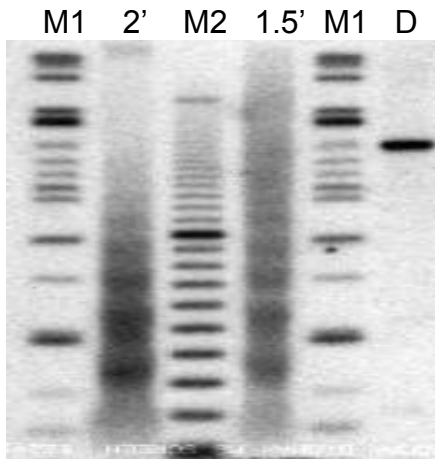

Chrom. 10-336

| Band # | bp   |
|--------|------|
| 8      | 1400 |
| 7      | 1220 |
| 6      | 1060 |
| 5      | 880  |
| 4      | 710  |
| 3      | 520  |
| 2      | 340  |
| 1      | 170  |

sigma = 6.523767

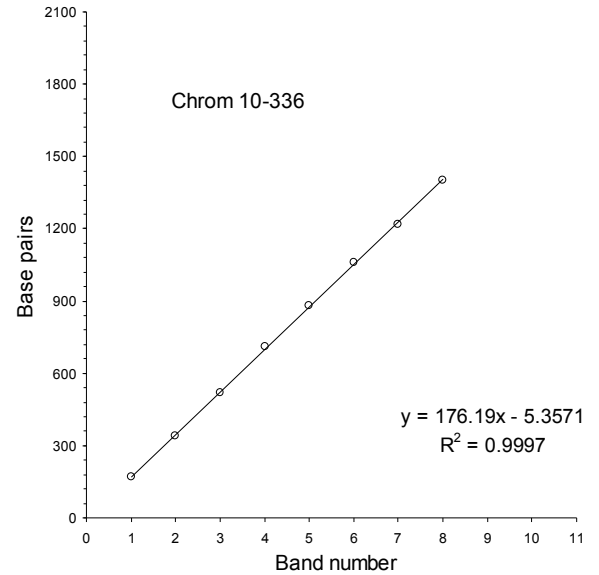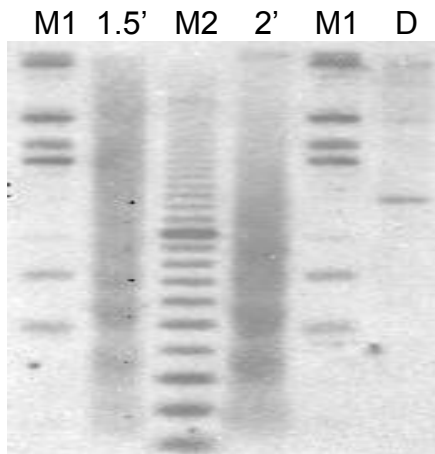

Chrom. 12-573

| Band # | bp   |
|--------|------|
| 7      | 1240 |
| 6      | 1060 |
| 5      | 880  |
| 4      | 700  |
| 3      | 520  |
| 2      | 340  |
| 1      | 170  |

sigma = 2.766423

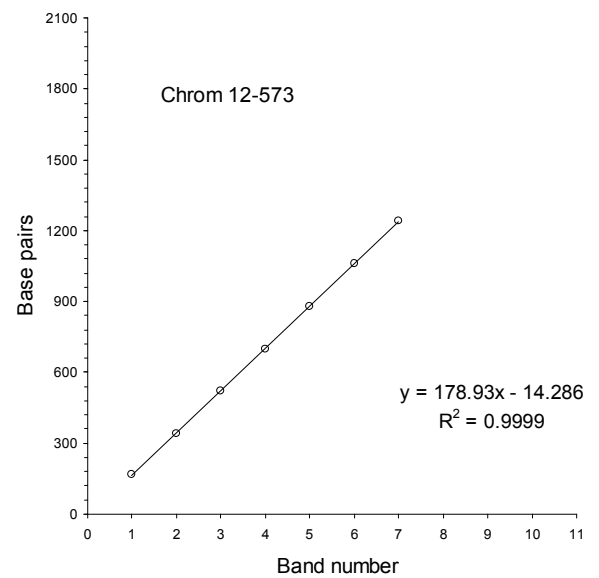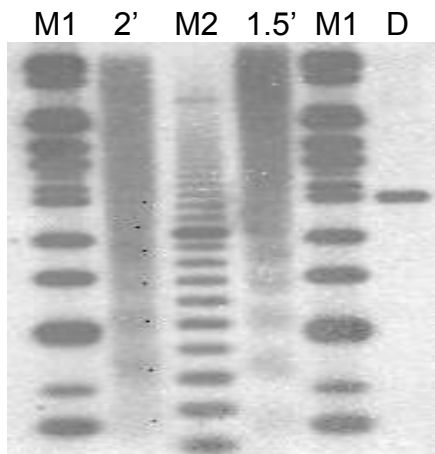

Chrom 15-407

| Band # | bp   |
|--------|------|
| 7      | 1240 |
| 6      | 1050 |
| 5      | 890  |
| 4      | 680  |
| 3      | 510  |
| 2      | 330  |
| 1      | 170  |

sigma = 10.47349

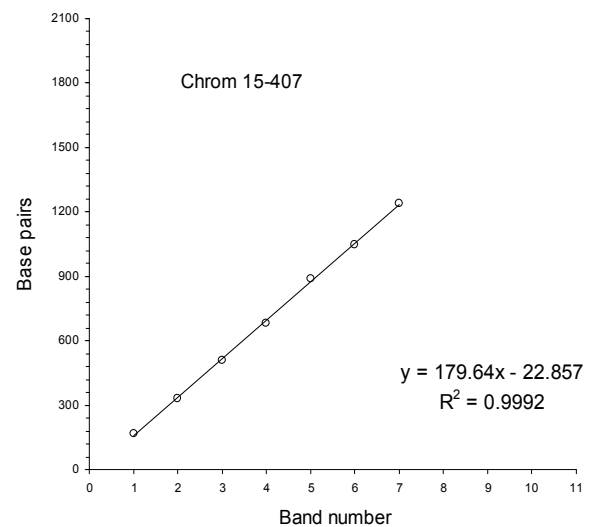

M1 = Afl III marker  
 M2 = 100 bp ladder  
 D = Naked DNA digest  
 Digestion times indicated

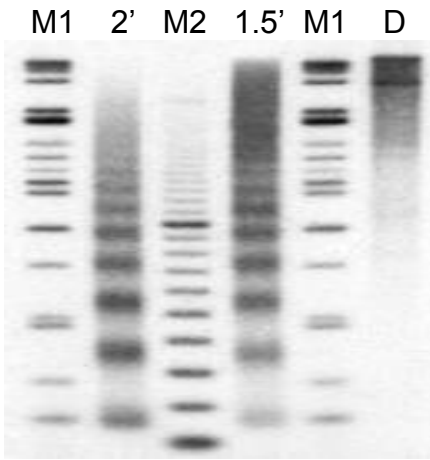

Chrom. 18-735

| Band # | bp   |
|--------|------|
| 9      | 1710 |
| 8      | 1520 |
| 7      | 1310 |
| 6      | 1110 |
| 5      | 920  |
| 4      | 740  |
| 3      | 530  |
| 2      | 350  |
| 1      | 160  |

sigma = 8.134669

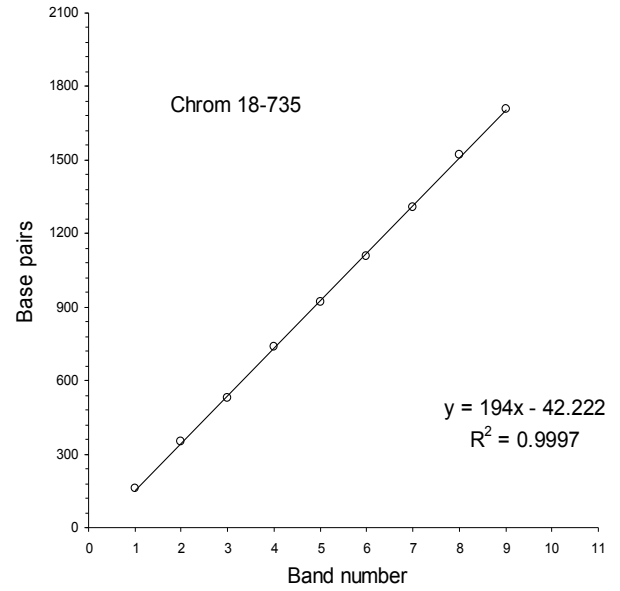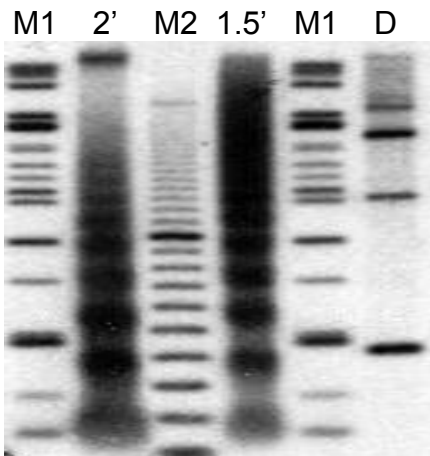

Chrom. 19-395

| Band # | bp   |
|--------|------|
| 8      | 1490 |
| 7      | 1300 |
| 6      | 1110 |
| 5      | 930  |
| 4      | 730  |
| 3      | 560  |
| 2      | 370  |
| 1      | 170  |

sigma = 5.721723

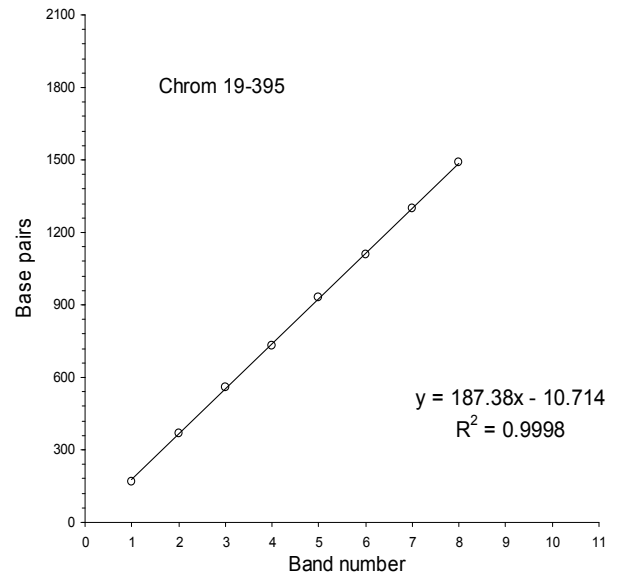

Supplement: nar_34_7_1974__3.pdf [file nar_34_7_1974__3.pdf]
