# Supplementary material
Source: PubMed Central journal article supplement (PMC1435979)

**Color code:** black circles = data points, black line = spline curve of data points,  
 blue line = Gaussians of data points, orange circles = sum of Gaussians

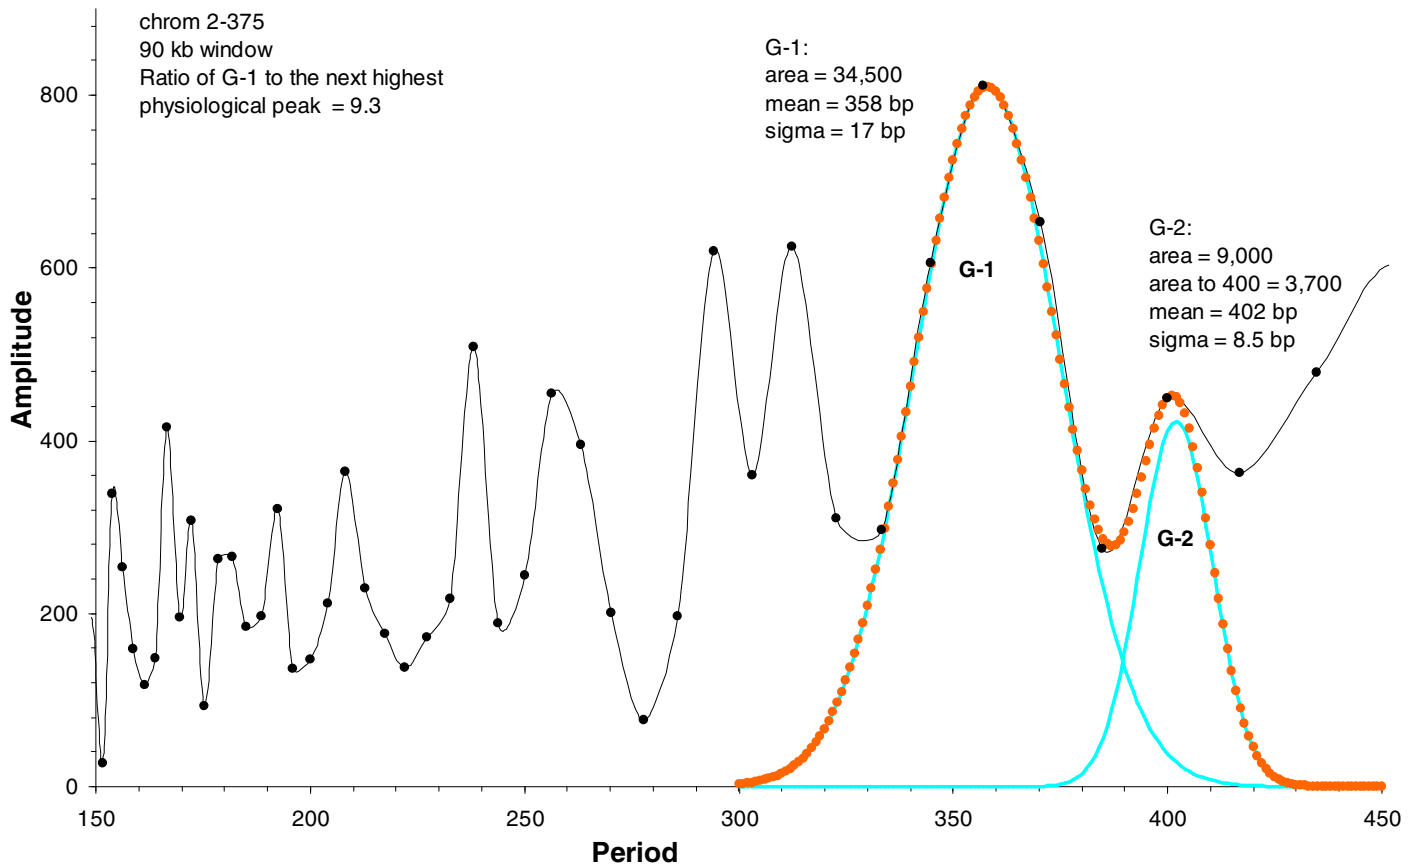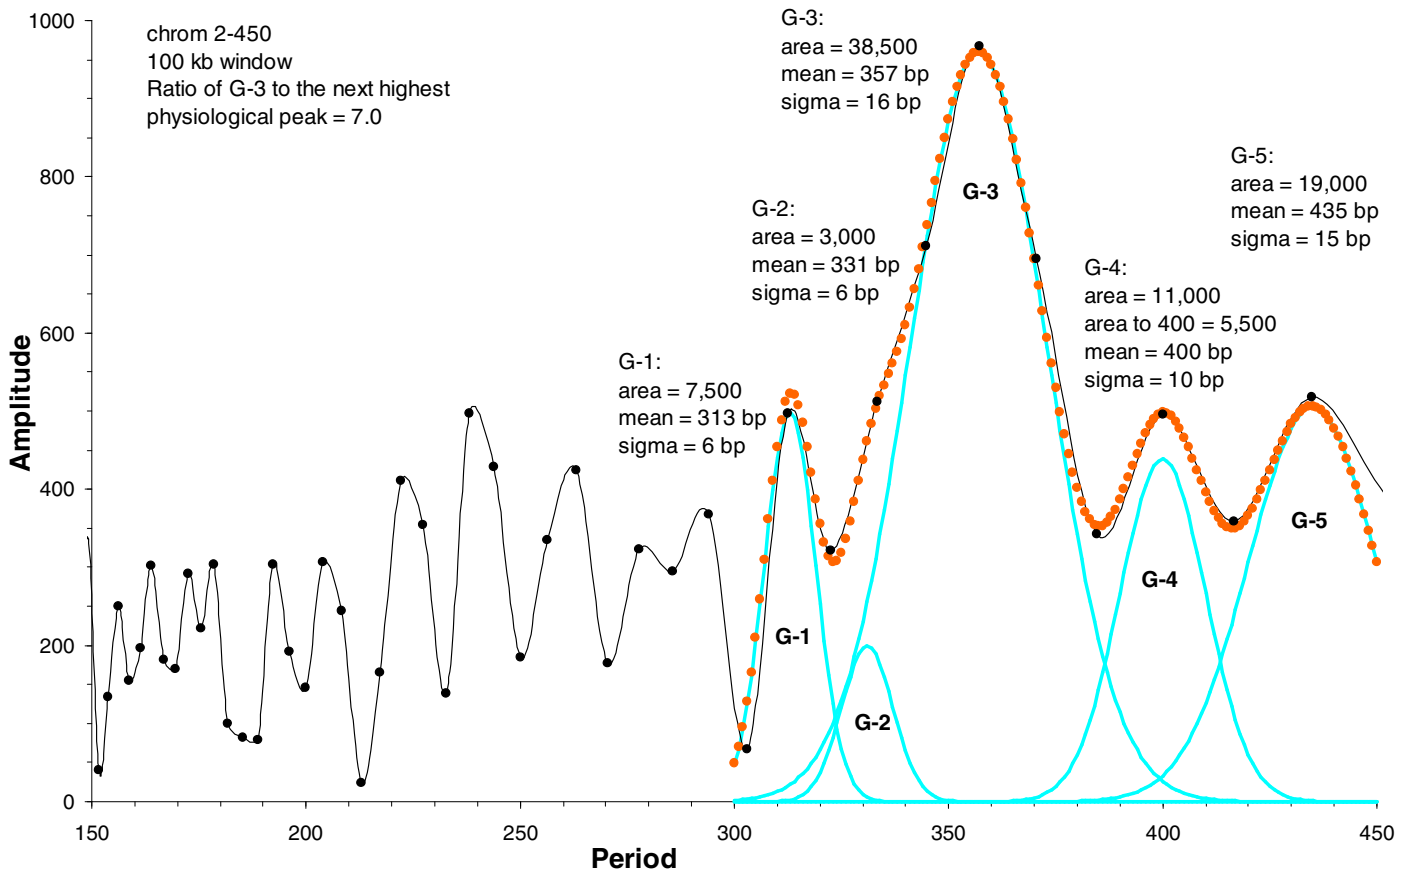

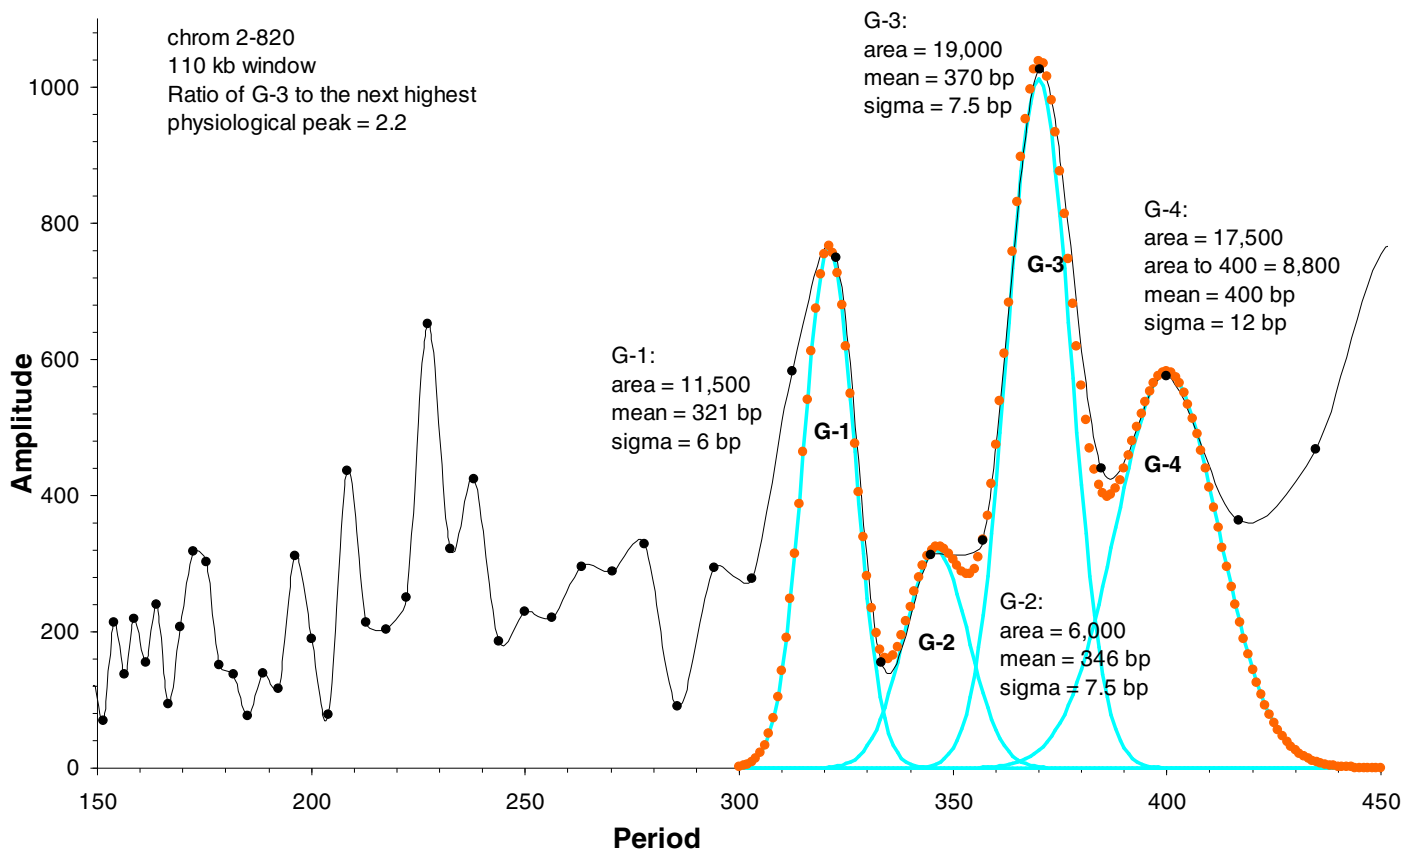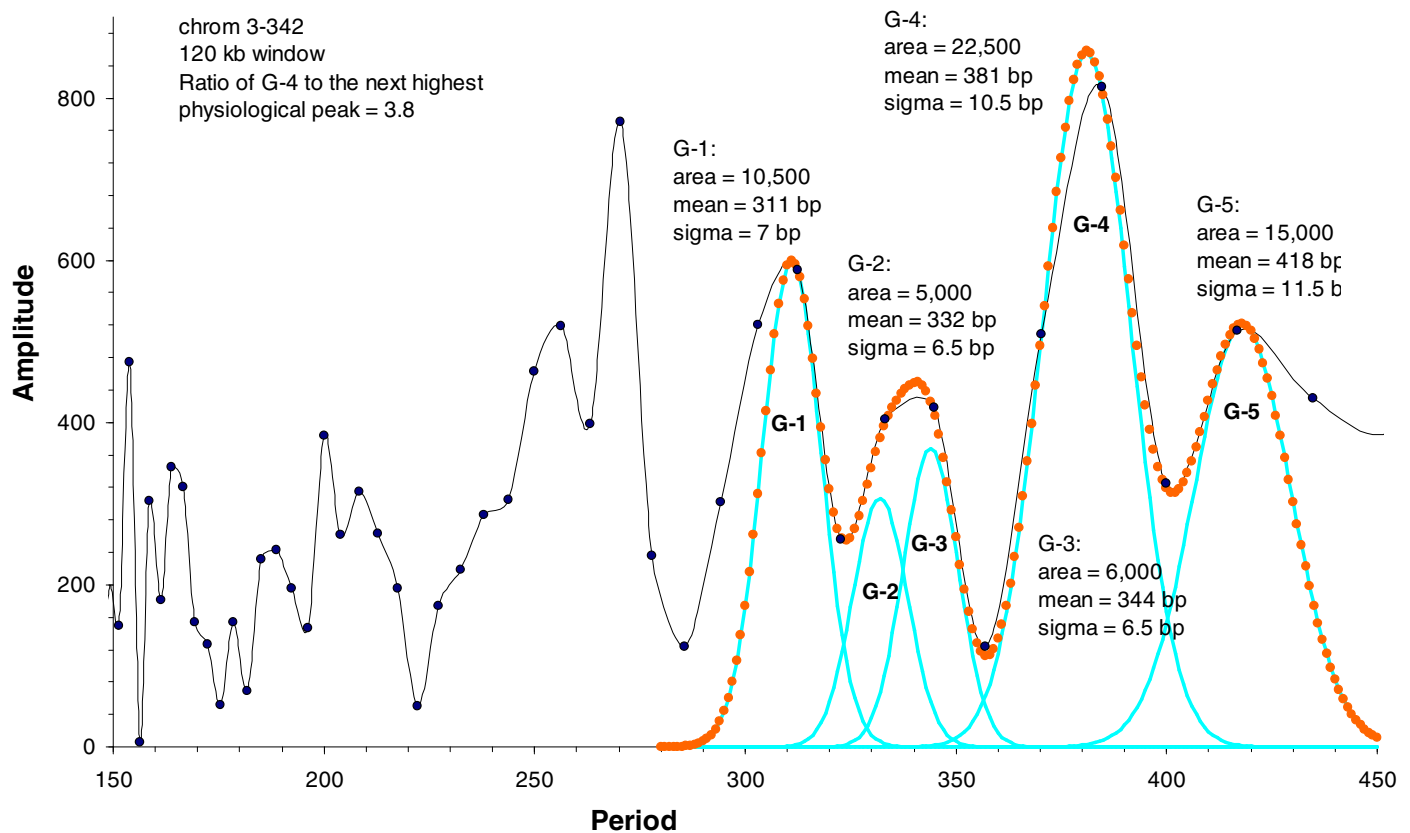

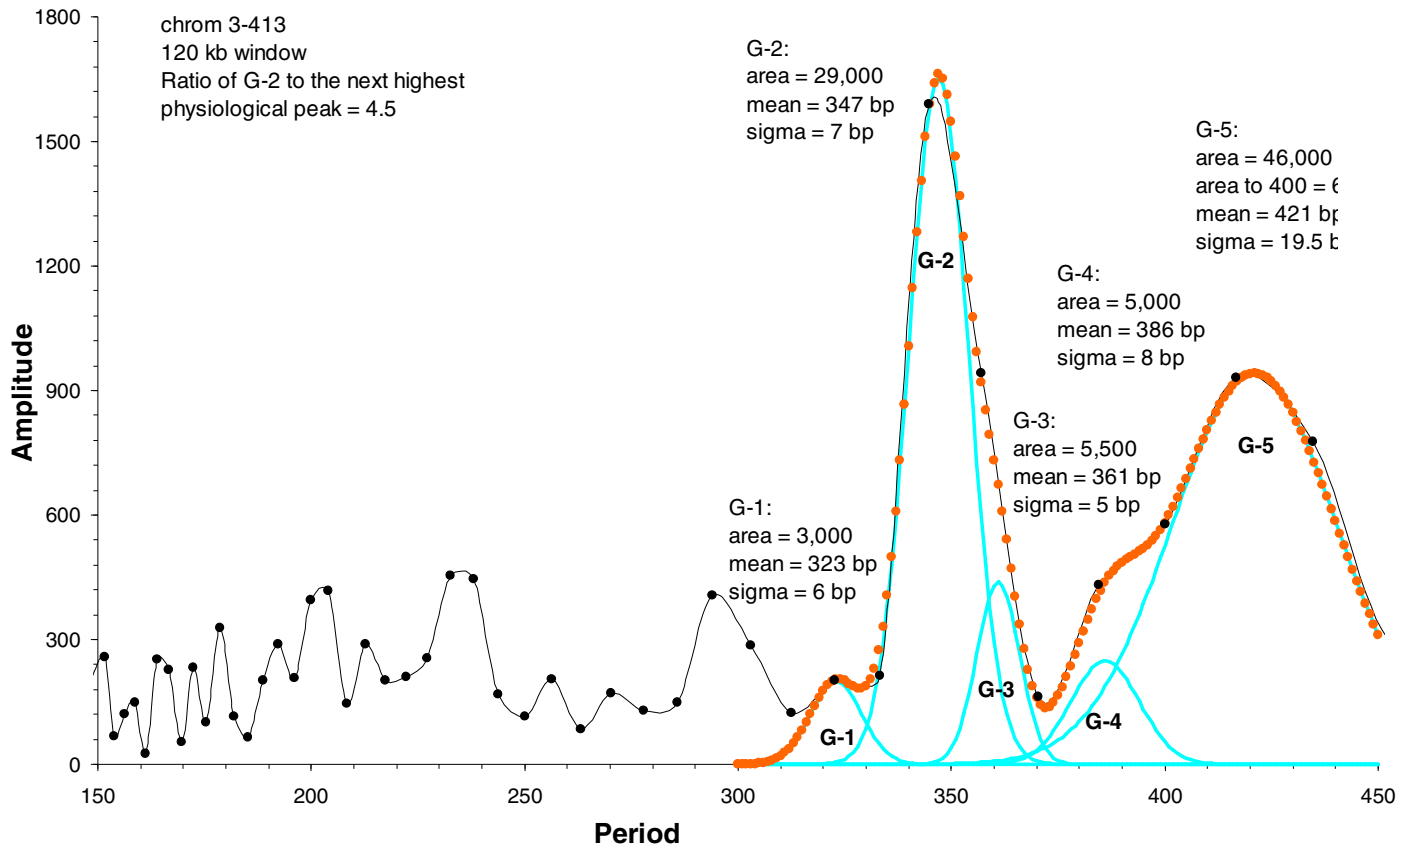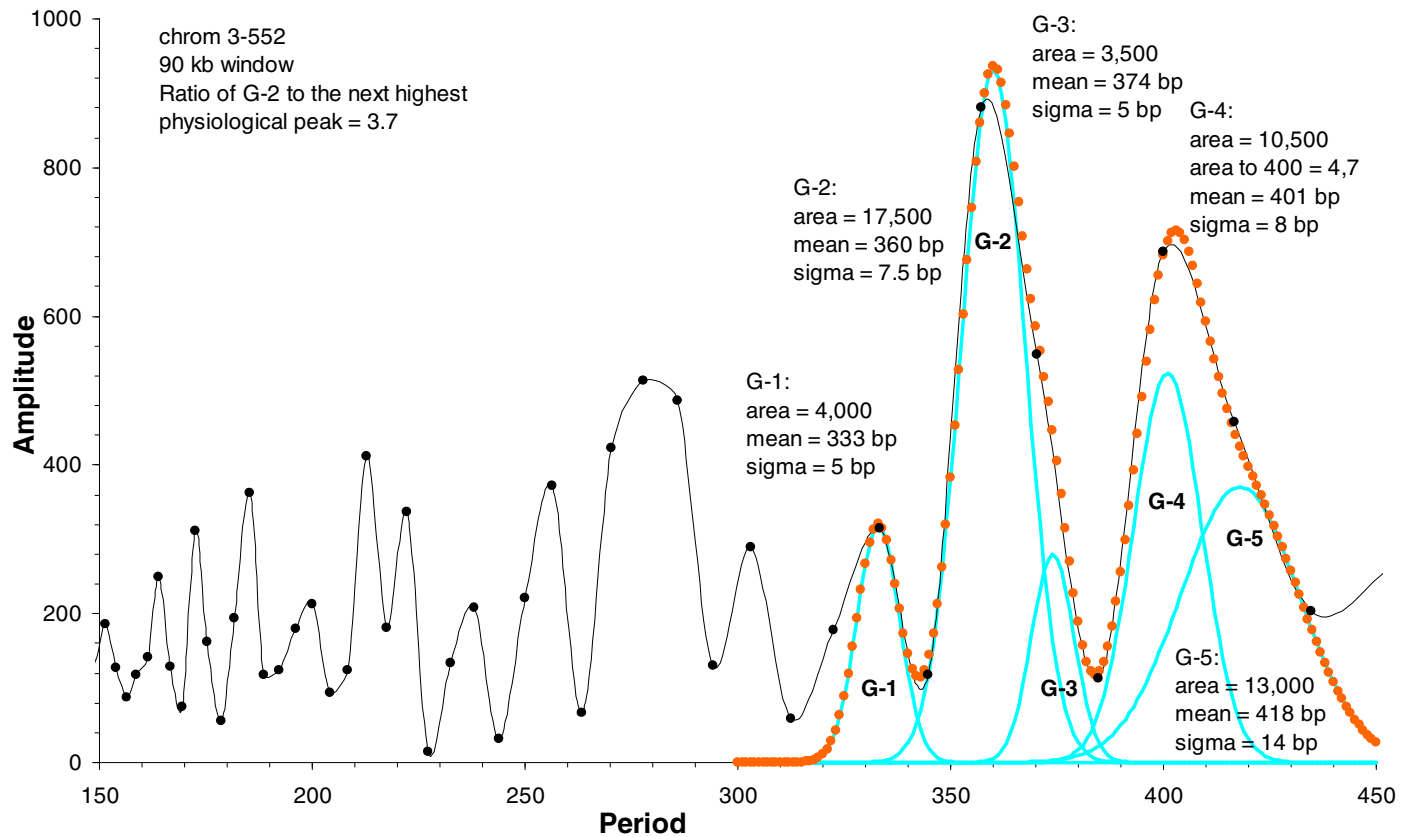

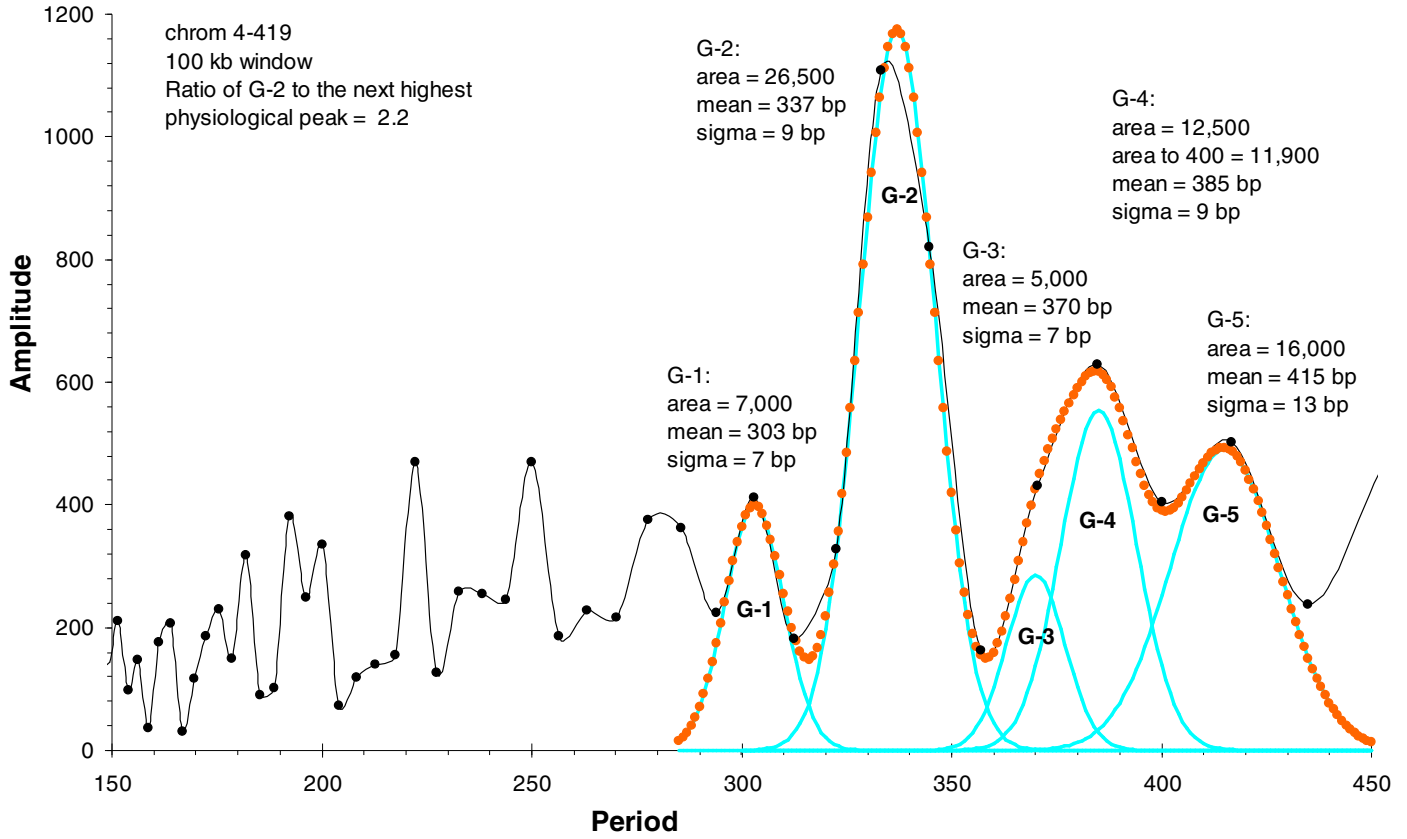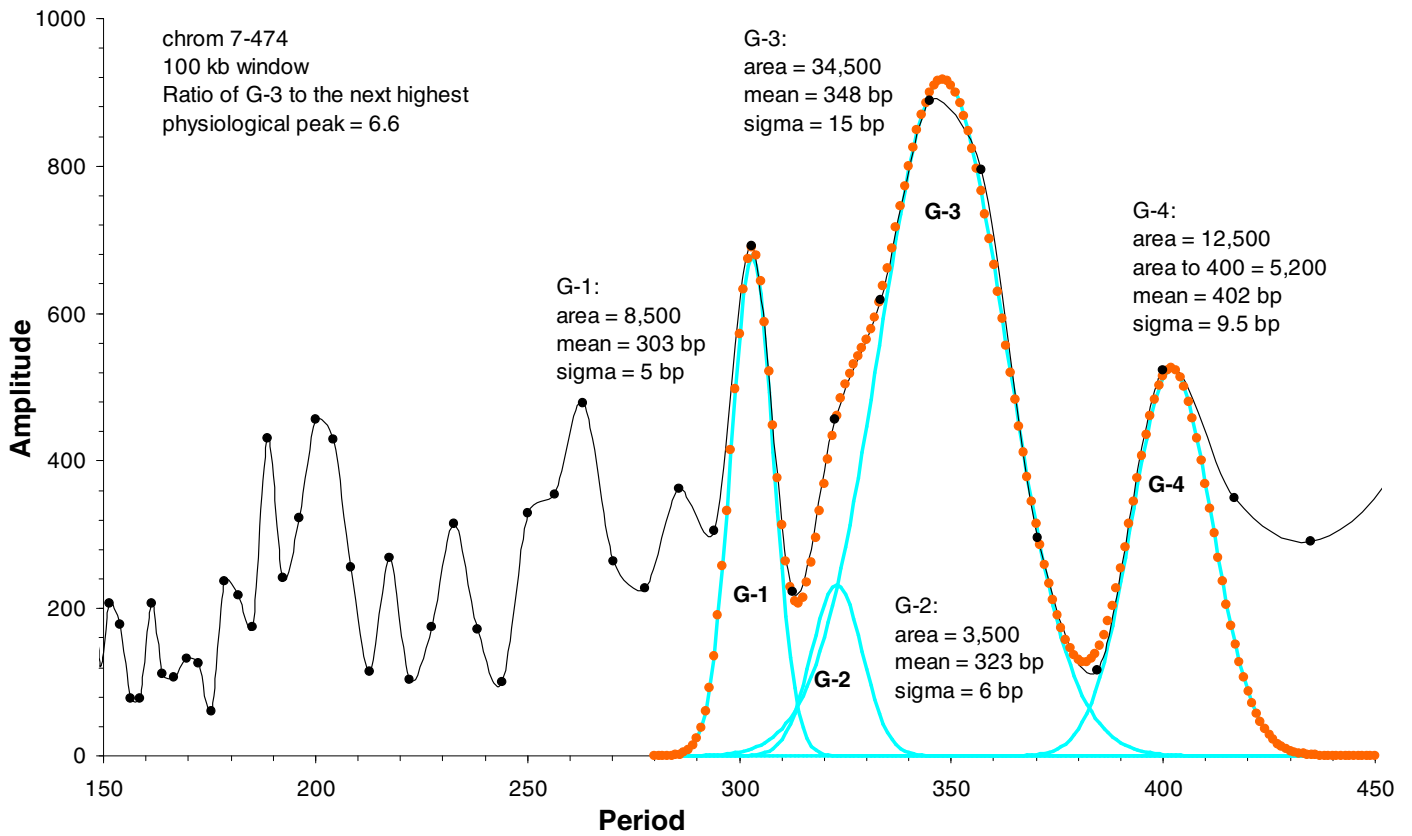

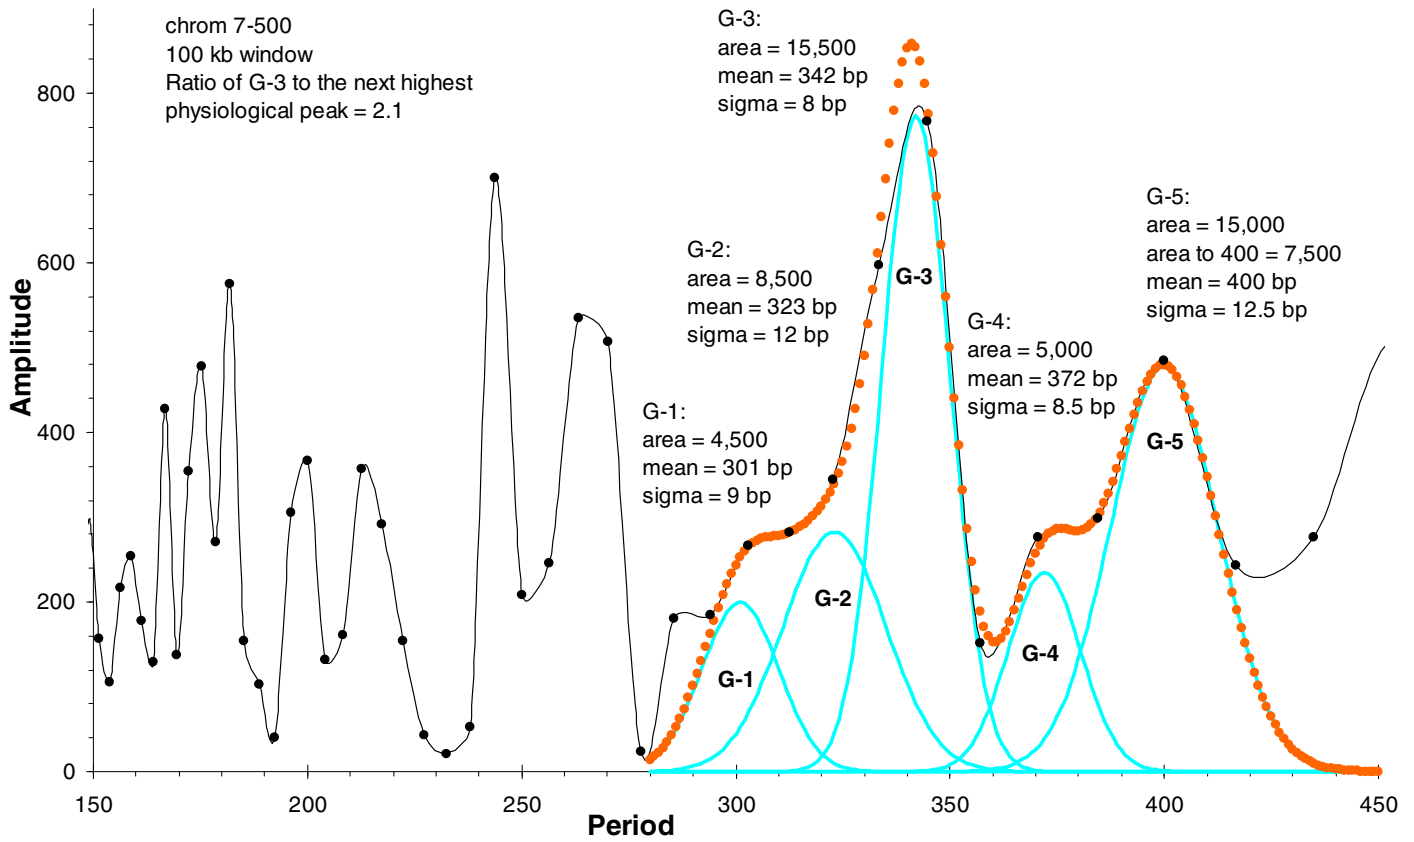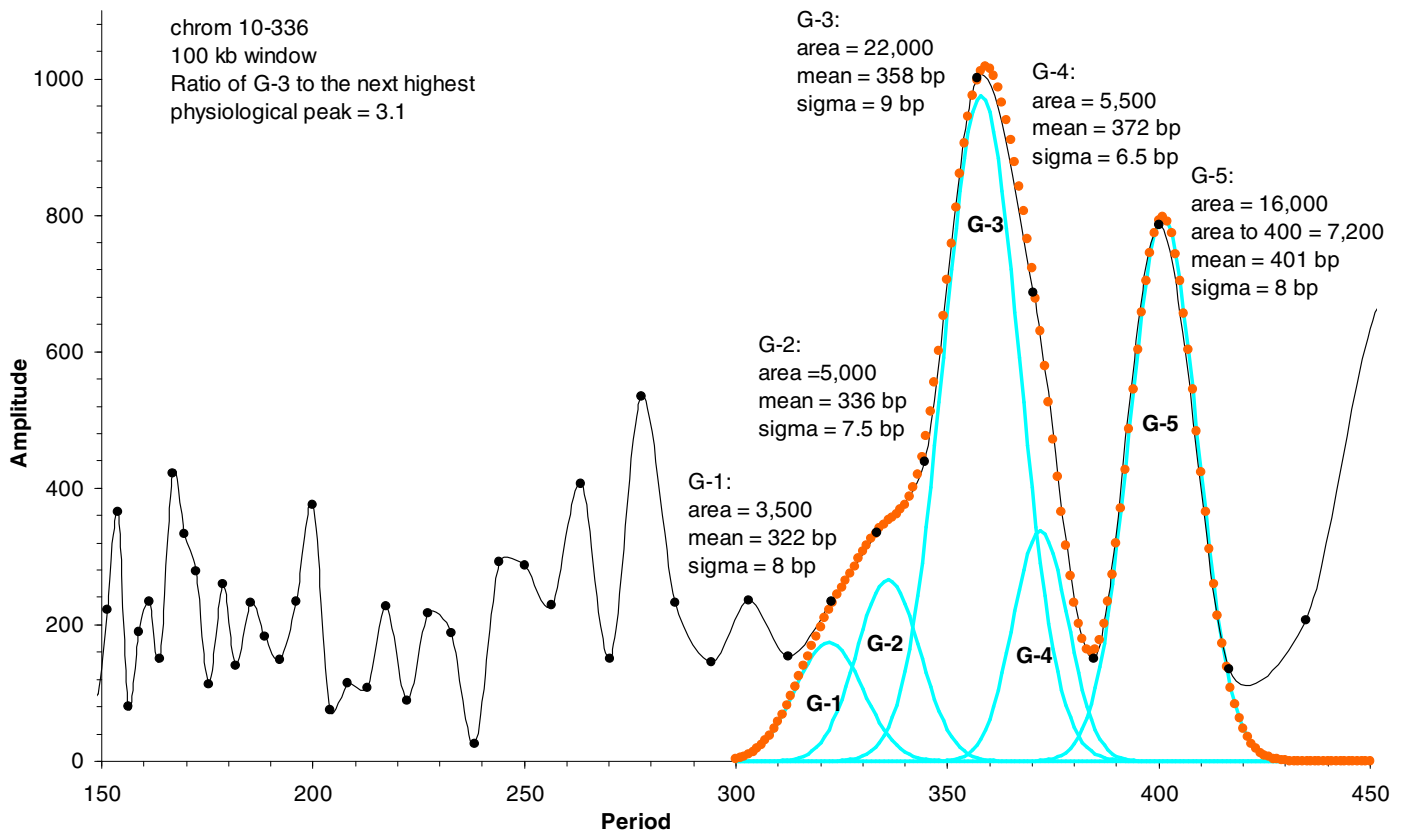

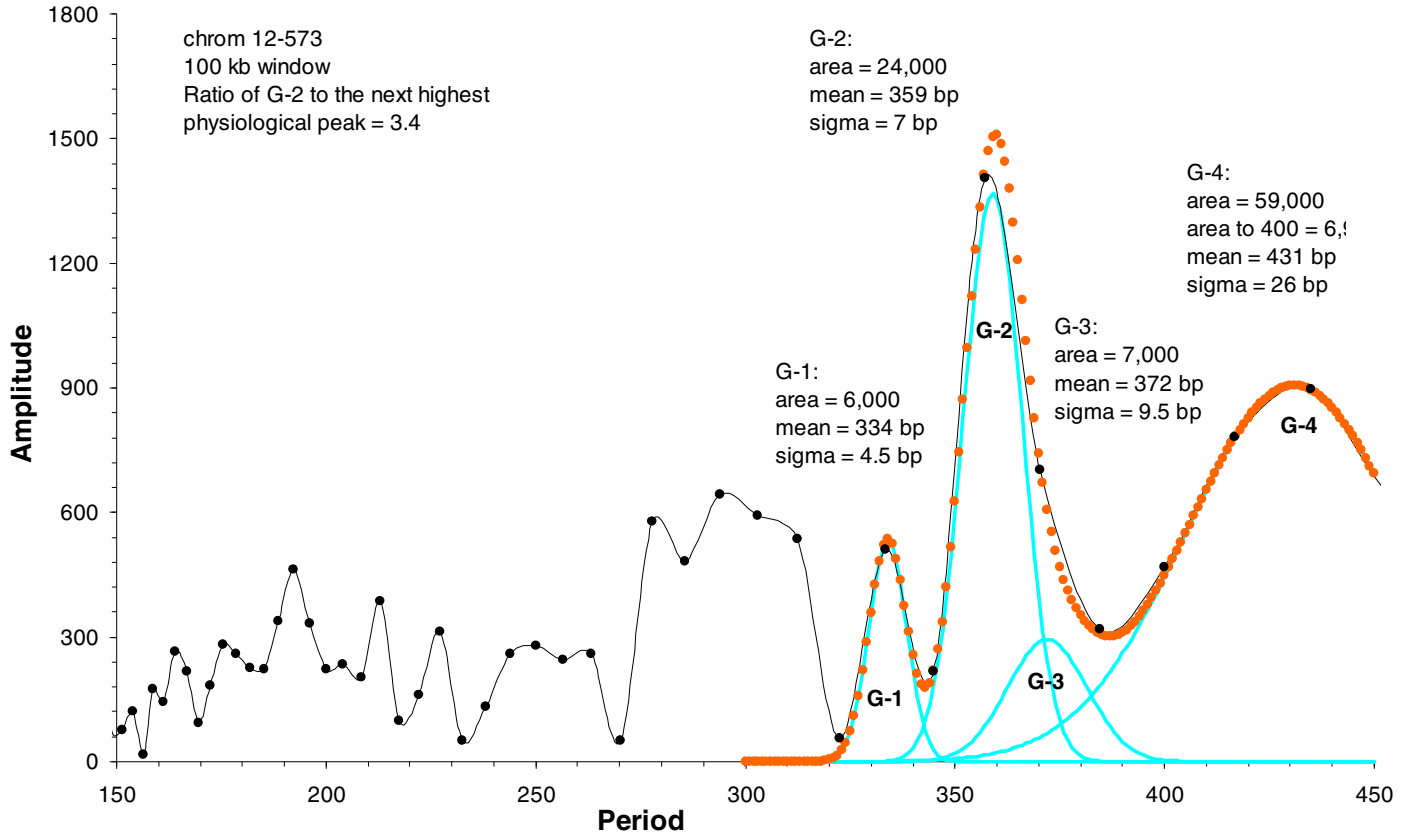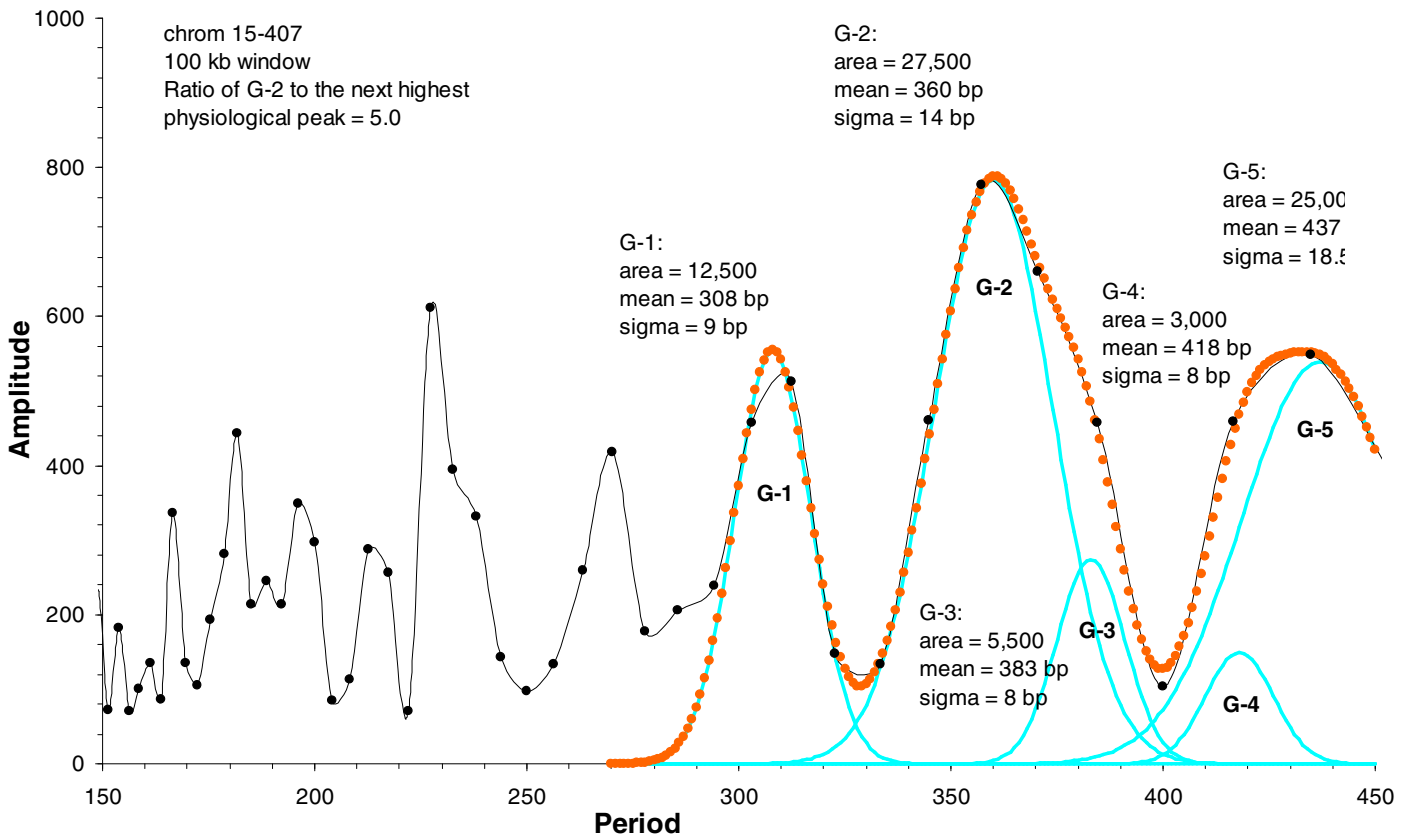

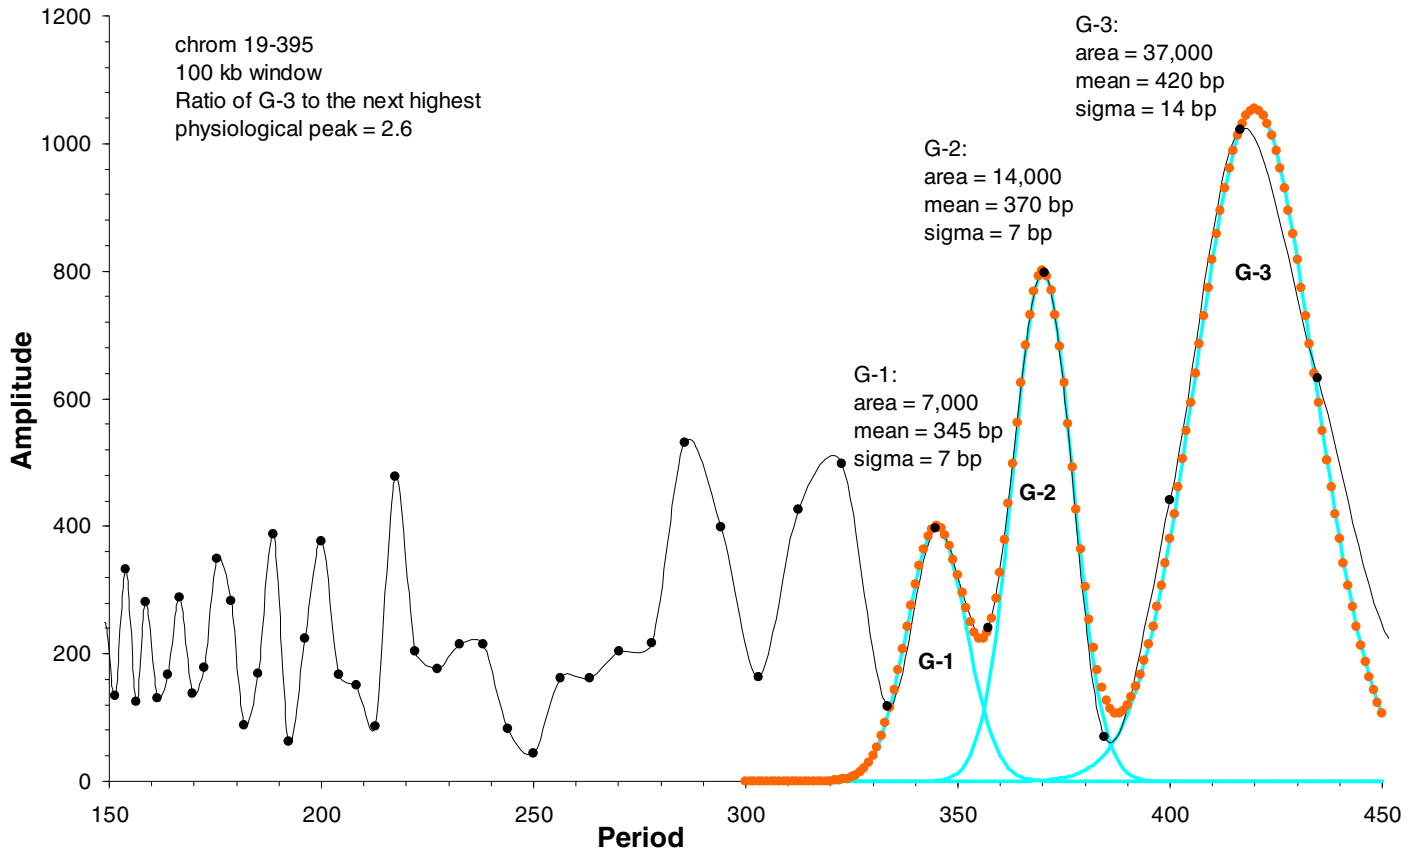

Supplement: nar_34_7_1974__2.pdf [file nar_34_7_1974__2.pdf]
